# Supplementary material
Source: publisher figshare collection journal article supplement (https://acs.figshare.com/ndownloader/files/24937591)
Supplement: Supplementary file 1 [file 24937591]

# A Robust Photothermal Coating Strategy for Efficient Ice Removal

*Yubo Liu<sup>a,b</sup>, Yang Wu<sup>\*b,c</sup>, Yizhe Liu<sup>b</sup>, Rongnian Xu<sup>b</sup>, Shujuan Liu<sup>\*a</sup>, Feng Zhou<sup>b</sup>*

<sup>a</sup> State Key Laboratory of Solidification Processing, Centre of Advanced  
Lubrication and Seal Materials, Northwest Polytechnical University, Xi'an, Shaanxi,  
710072, PR China.

<sup>b</sup> State Key Laboratory of Solid Lubrication, Lanzhou Institute of Chemical  
Physics, Chinese Academy of Science, Gansu Lanzhou 730000, PR China.

<sup>c</sup> Qingdao Centre of Resource Chemistry and New materials, Shandong,  
Qingdao 266100, PR China.

\*Corresponding Author. E-mail: yangwu@licp.cas.cn; liusj@nwpu.edu.cn

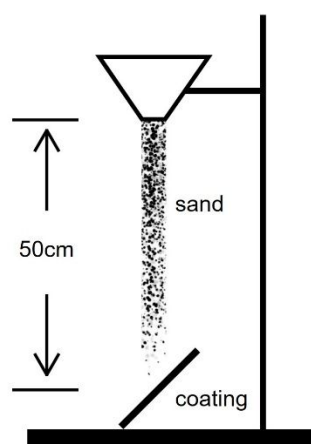

**Figure S1** Schematic of sand corrosion test.

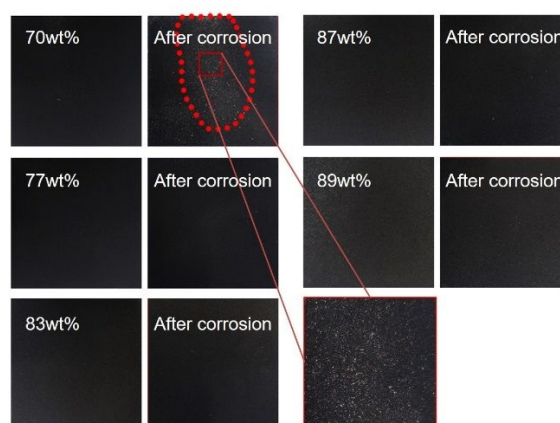

**Figure S2** Photo images of coating surfaces after sand abrasion test.

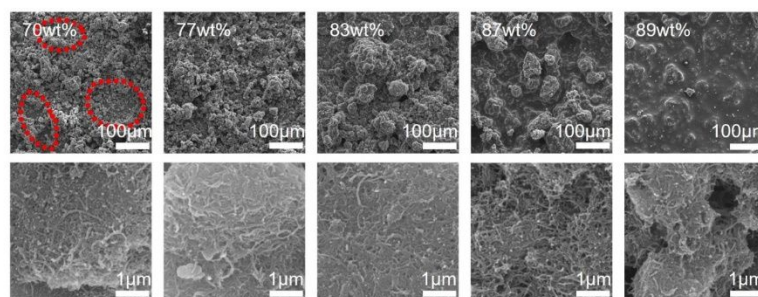

**Figure S3** SEM images of coating surfaces after sand abrasion.

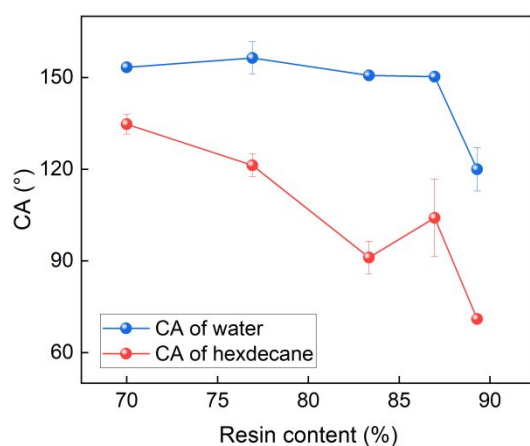

**Figure S4** Contact angles of water and hexadecane on amphiphobic coating surface after sand abrasion.

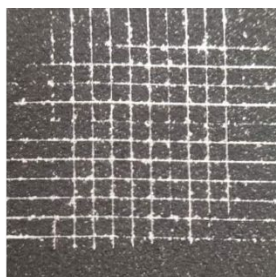

**Figure S5** Photographs of coating surfaces after blades slashing.

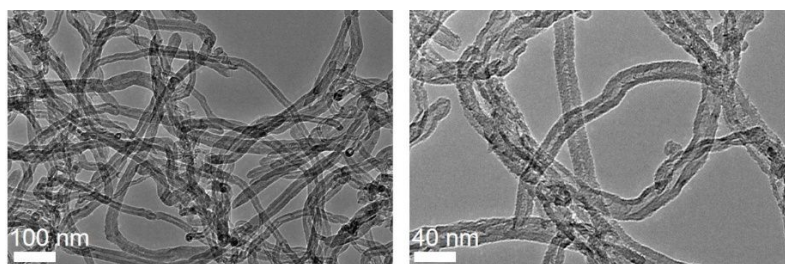

**Figure S6** TEM images of raw MWCNTs at various amplification.

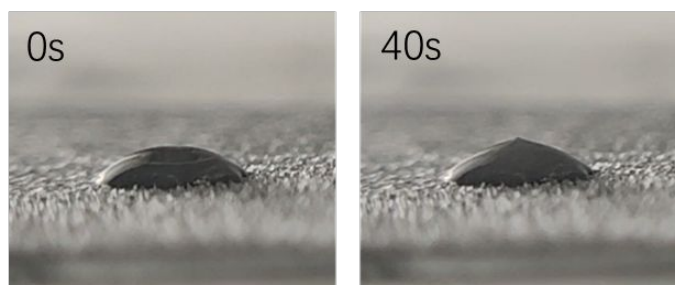

**Figure S7** Water droplet freeze on hydrophilic photothermal coating after plasma etching within 40s, which means the disappearance of anti-icing performance.

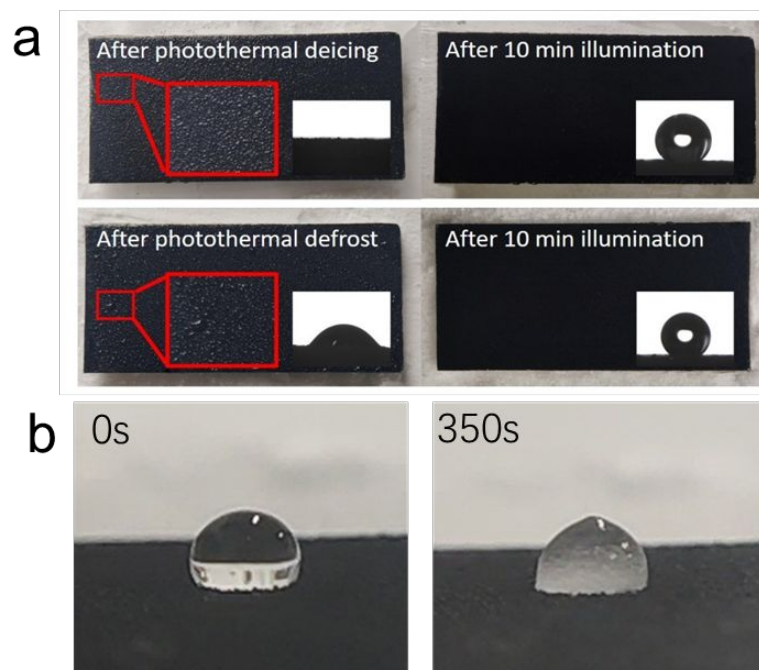

**Figure S8** (a) Photo images and contact angles on surfaces after photothermal deicing/defrosting and after irradiation healing. (b) Droplet freeze on the coating surface after sunlight irradiation healing.

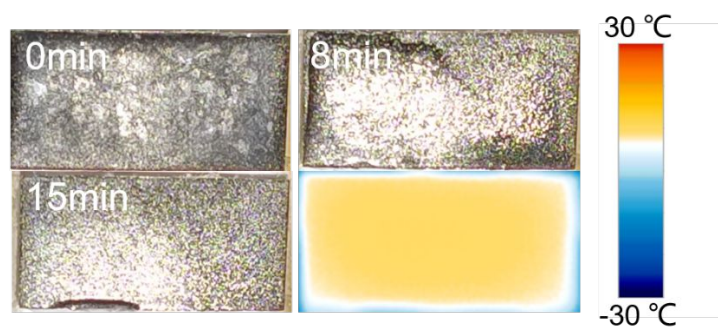

**Figure S9** Photographs and infrared image of photothermal deicing process on self-healed CNTs photothermal coating.
